# Supplementary material
Source: HighWire-hosted journal article supplement (https://jnm.snmjournals.org/highwire/filestream/95096/field_highwire_adjunct_files/0/185934_Supplemental_Data.pdf)
Supplement: 185934_Supplemental_Data.pdf [file 185934_Supplemental_Data.pdf]

## Supplemental Figure 1

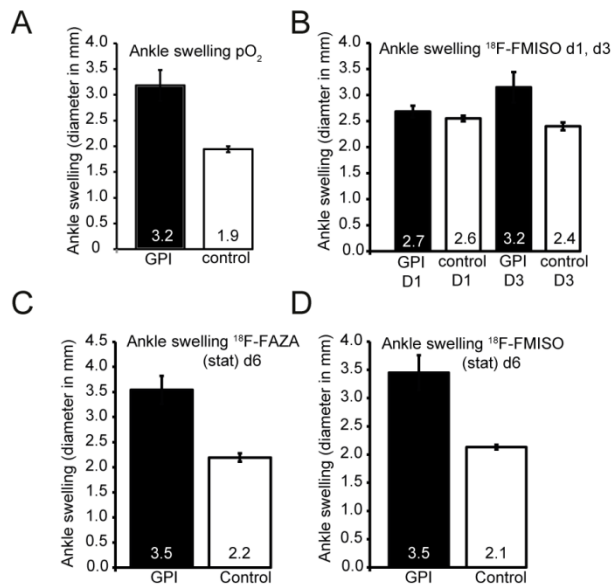

Ankle swelling (diameter in mm) in the experimental mice measured with a pO<sub>2</sub>-probe (A) on day 6 after GPI- or control-serum injection. (B) Ankle thickening in the GPI- and control-serum injected mice investigated on days 1, 3 and 6 (D) by <sup>18</sup>F-FMISO-PET. (C) Ankle thickening in GPI- and control-serum injected mice investigated with <sup>18</sup>F-FAZA-PET on day 6 after serum transfer.

## Supplemental Figure 2

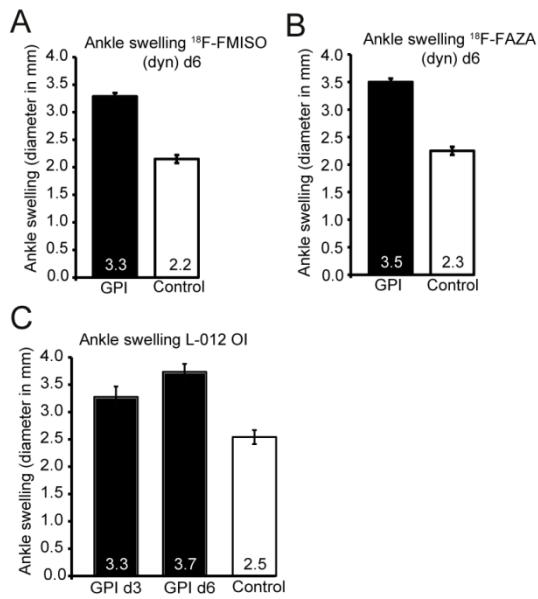

Ankle swelling (diameter in mm) in the experimental mice on day 6 after GPI- or control-serum injection measured dynamically with  $^{18}\text{F}$ -FMISO (A) and  $^{18}\text{F}$ -FAZA on day 6 (B). Ankle thickening in GPI- and control-serum injected mice investigated on days 3 and 6 using L-012-OI to measure ROS *in vivo* (C).
